1 **Cortical tracking of unheard formant modulations derived from silently presented lip**  
2 **movements and its decline with age**

3  
4 Nina Suess\*<sup>1</sup>, Anne Hauswald<sup>1</sup>, Patrick Reisinger<sup>1</sup>, Sebastian Rösch<sup>2</sup>, Anne Keitel<sup>3</sup> † &  
5 Nathan Weisz<sup>1,4</sup> †

6  
7 <sup>1</sup>Centre for Cognitive Neuroscience and Department of Psychology,  
8 University of Salzburg, Austria

9 <sup>2</sup>Department of Otorhinolaryngology, Head and Neck Surgery, Paracelsus Medical University  
10 Salzburg, University Hospital Salzburg, Salzburg, Austria

11 <sup>3</sup>School of Social Sciences, University of Dundee

12 <sup>4</sup>Neuroscience Institute, Christian Doppler University Hospital, Paracelsus Medical  
13 University, Salzburg, Austria

14  
15  
16  
17  
18  
19  
20  
21  
22  
23  
24  
25  
26

27 Address for correspondence:

28 Nina Suess

29 University of Salzburg

30 Centre for Cognitive Neuroscience

31 Hellbrunner Straße 34

32 A-5020 Salzburg

33 Austria/Europe

34 Tel.: 0043 662 8044 5161

35 E-Mail: [nina.suess@sbq.ac.at](mailto:nina.suess@sbq.ac.at)

36

37 †shared senior authors

38 **Abstract**

39 The integration of visual and auditory cues is crucial for successful processing of speech,  
40 especially under adverse conditions. Recent reports have shown that when participants watch  
41 muted videos of speakers, the phonological information about the acoustic speech envelope  
42 is tracked by the visual cortex. However, the speech signal also carries much richer acoustic  
43 details, e.g. about the fundamental frequency and the resonant frequencies, whose visuo-  
44 phonological transformation could aid speech processing. Here, we investigated the neural  
45 basis of the visuo-phonological transformation processes of these more fine-grained acoustic  
46 details and assessed how they change with ageing. We recorded whole-head  
47 magnetoencephalography (MEG) data while participants watched silent intelligible and  
48 unintelligible videos of a speaker. We found that the visual cortex is able to track the unheard  
49 intelligible modulations of resonant frequencies and the pitch linked to lip movements.  
50 Importantly, only the processing of intelligible unheard formants decreases significantly with  
51 age in the visual and also in the cingulate cortex. This is not the case for the processing of the  
52 unheard speech envelope, the fundamental frequency or the purely visual information carried  
53 by lip movements. These results show that unheard spectral fine-details (along with the  
54 unheard acoustic envelope) are transformed from a mere visual to a phonological  
55 representation. Aging affects especially the ability to derive spectral dynamics at formant  
56 frequencies. Since listening in noisy environments should capitalize on the ability to track  
57 spectral fine-details, our results provide a novel focus on compensatory processes in such  
58 challenging situations.

59

60

61 *Keywords:* MEG, visual speech processing, low-frequency speech tracking, multisensory  
62 processing

## 63 **1 Introduction**

64 Speech understanding is a multisensory process that requires diverse modalities to work  
65 together for an optimal experience. Congruent audiovisual input is especially crucial for  
66 understanding speech in noise (Crosse et al., 2016; Sumbly & Pollack, 1954), highlighting the  
67 importance of visual cues in speech processing studies. One hypothesis is that activation from  
68 visual speech directly modulates activation in auditory cortex, although the results have been  
69 mixed and a lot of questions remain unanswered (Bernstein & Liebenthal, 2014; Keitel et al.,  
70 2020). One important question regards the nature of the representation in the visual cortex,  
71 and whether it is strictly visual or already tracks acoustic information that is associated with  
72 the visual input (for non-speech stimuli see e.g. Escoffier et al., 2015). A first approach to  
73 address this showed that occipital activation elicited by silent lip reading also reflects dynamics  
74 of the acoustic envelope (O'Sullivan et al., 2017). Further evidence that the visual cortex is  
75 able to track certain aspects of speech by visual cues alone comes from a recent study by  
76 Hauswald et al. (2018). Evidently, it has been shown that visual speech contributes  
77 substantially to audiovisual speech processing in the sense that the visual cortex is able to  
78 extract phonological information from silent lip movements in the theta-band (4-7 Hz).  
79 Crucially, this tracking is dependent on the intelligibility of the silent speech, with absent  
80 tracking when the silent visual speech is unintelligible. Another study supports the former  
81 findings and extends the present framework by providing evidence that the visual cortex  
82 passes information to the angular gyrus, which extracts slow features (below 1 Hz) from lip  
83 movements, which are then mapped onto auditory features and passed on to auditory cortices  
84 for better speech comprehension (Bourguignon et al., 2020). These findings underline the  
85 importance of slow frequency properties of visual speech for enhanced speech  
86 comprehension from both the delta (0.5-3 Hz) and theta-band (4-7 Hz), especially due to  
87 frequencies between 1-7 Hz being crucial for comprehension (Giraud & Poeppel, 2012).  
88 Moreover, the spectral profile of lip movements is also settled within this range (Park et al.,  
89 2016).

90 Recent behavioural evidence describes that spectral fine details can also be extracted by  
91 observation of lip movements (Plass et al., 2020). This raises the interesting question whether  
92 this information is also represented at the level of the visual cortex, analogous to the envelope  
93 as shown previously (Hauswald et al., 2018). Particularly relevant spectral fine details are  
94 formant peaks around 2500 Hz, which are indicated to be modulated in the front cavity (Badin  
95 et al., 1990). This corresponds to expansion and contraction of the lips (Plass et al., 2020),  
96 thus having a relationship with certain lip movements and could therefore be extracted for  
97 important phonological cues.

98 Furthermore, not only resonant frequencies, but also the fundamental frequency (or pitch  
99 contour) plays an important role in speech understanding in noisy environments (Hopkins et

100 al., 2008), and could potentially be extracted from silent lip movements. Whether the visual  
101 cortex is able to track formant and pitch information in (silent) visual speech, has not been  
102 investigated to date.

103 Knowledge on how the brain is processing speech is also vital when it comes to ageing,  
104 potentially with regards to age-related hearing loss (Lieberman, 2017). Several studies have  
105 investigated the influence of age on speech comprehension, with results that signify ageing  
106 is, in most cases, accompanied by listening difficulties, especially in noise (Tun & Wingfield,  
107 1999; Wong et al., 2009). Furthermore, while the auditory tracking of a speech-paced  
108 stimulation (~ 3 Hz) is less consistent in older adults compared to younger adults, alpha  
109 oscillations are enhanced in younger adults during attentive listening, suggesting declined top-  
110 down inhibitory processes that support selective suppression of irrelevant information (Henry  
111 et al., 2017). Older adults also indicate a compensatory mechanism when processing  
112 degraded speech especially in anterior cingulate cortex (ACC) and middle frontal gyrus (Erb  
113 & Obleser, 2013). Additionally, the temporal processing of auditory information is altered in  
114 the ageing brain, pointing to decreased selectivity for temporal modulations in primary auditory  
115 areas (Erb et al., 2020). Those studies reinforce a distinctive age-related alteration in  
116 processing auditory speech. This raises the question whether we also see an impact of age  
117 on audiovisual speech processing, an issue that has not been addressed so far.

118 Combining the important topics mentioned above, this study aims to answer two critical  
119 questions regarding audiovisual speech processing: First, we ask if the postulated visuo-  
120 phonological transformation process in visual cortex mainly represents global energy  
121 modulations (i.e. speech envelope) or if it also entails spectral fine details (like formant or pitch  
122 curves). Second, we question if visuo-phonological transformation is subject to age-related  
123 decline. To the best of our knowledge, this study presents first neurophysiological evidence  
124 that the visual cortex is not only able to extract the unheard speech envelope, but also unheard  
125 formant and pitch information from lip movements. Crucially, we observed an age-related  
126 decline that mainly affects tracking of the formants (and to some extent the envelope and the  
127 fundamental frequency). Interestingly, we observed different tracking properties for different  
128 brain regions and frequencies: While tracking intelligible formants declines reliably in occipital  
129 and cingulate cortex for both delta and theta, we observed a decline of theta-tracking just in  
130 occipital cortex, suggesting different age-related effects in different brain regions. Our results  
131 suggest that the ageing brain deteriorates in deriving spectral fine-details linked to the visual  
132 input, a process that could contribute to perceptual difficulties in challenging listening  
133 situations.

## 134 **2 Materials and methods**

135

### 136 *2.1 Participants*

137 We recruited 50 participants (28 females; 2 left-handed; mean age: 37.96 years; SD: 13.33  
138 years, range: 19-63 years) for the experiment. All participants had normal or corrected-to-  
139 normal eyesight, self-reported normal hearing and no neurological disorders. All participants  
140 received either a reimbursement of €10 per hour or course credits for their participation. All  
141 participants signed an informed consent form. The experimental procedure was approved by  
142 the Ethics Committee of the University of Salzburg.

143

### 144 *2.2 Stimuli*

145 Videos were recorded with a digital camera (Sony NEX FS100) at a rate of 50 frames per  
146 second, the corresponding audio files were recorded at a sampling rate of 48 kHz. The videos  
147 were spoken by two female native German speakers. The stimuli were taken from the book  
148 “Das Wunder von Bern” (“The Miracle of Bern”; [https://www.aktion-](https://www.aktion-mensch.de/inklusion/bildung/bestellservice/materialsuche/detail?id=62)  
149 [mensch.de/inklusion/bildung/bestellservice/materialsuche/detail?id=62](https://www.aktion-mensch.de/inklusion/bildung/bestellservice/materialsuche/detail?id=62)) which was provided  
150 in an easy language. The easy language does not include any foreign words, has a coherent  
151 verbal structure and is facile to understand. We used simple language to avoid that limited  
152 linguistic knowledge is interfering with possible lip reading abilities. 24 pieces of text were  
153 chosen from the book and recorded from each speaker, lasting between 33 and 62 seconds,  
154 thus resulting in 24 videos. Additionally, all videos were reversed, which resulted in 24 forward  
155 videos and 24 corresponding backward videos. Forward and backward audio files were  
156 extracted from the videos and used for the data analysis. Half of the videos were randomly  
157 selected to be presented forward and the remaining half to be presented backward. The videos  
158 were back-projected on a translucent screen in the centre of the screen by a Propixx DLP  
159 projector (VPixx technologies, Canada) with a refresh rate of 120 Hz per second and a screen  
160 resolution of 1920 x 1080 pixels. The translucent screen was placed ~110 cm in front of the  
161 participant and had a screen diagonal of 74 cm. One speaker was randomly chosen per  
162 subject and kept throughout the experiment, so each participant only saw one speaker.

163

### 164 *2.3 Procedure*

165 Participants were first instructed to take part in an online study, in which their behavioural lip  
166 reading abilities were tested, and in which they were asked about their subjective hearing  
167 impairment. This German lip reading test is available as SaLT (Salzburg Lipreading Test)  
168 (Suess et al., 2021). Participants were presented with silent videos of numbers, words and  
169 sentences and could watch every video twice. They then had to write down the words they  
170 thought they had understood from the lip movements. This online test lasted approximately 40

171 minutes and could be conducted at home or right before the experiment in the MEG-lab. After  
172 completing the behavioural experiment, the MEG experiment started. Participants were  
173 instructed to pay attention to the lip movements of the speakers and passively watch the mute  
174 videos. They were presented with 6 blocks of videos, and in each block, 2 forward and 2  
175 backward videos were presented in a random order. The experiment lasted about an hour  
176 including preparation. The experimental procedure was programmed in Matlab with the  
177 Psychtoolbox-3 (Brainard, 1997) and an additional class-based abstraction layer  
178 ([https://gitlab.com/thht/o\\_ptb](https://gitlab.com/thht/o_ptb)) programmed on top of the Psychtoolbox (Hartmann & Weisz,  
179 2020).

180

#### 181 *2.4 Data acquisition*

182 Brain activity was measured using a 306-channel whole head MEG system with 204 planar  
183 gradiometers and 102 magnetometers (Neuromag TRIUX, Elekta), a sampling rate of 1000  
184 Hz and an online highpass-filter of 0.1 Hz. Before entering the magnetically shielded room  
185 (AK3B, Vakuumschmelze, Hanau, Germany), the head shape of each participant was  
186 acquired using approximately 500 digitized points on the scalp, including fiducials (nasion, left  
187 and right pre-auricular points) with a Polhemus Fastrak system (Polhemus, Vermont, USA).  
188 The head position of each individual participant relative to the MEG sensors was controlled  
189 once before each experimental block. Vertical and horizontal eye movements and  
190 electrocardiographic data was also recorded, but not used for preprocessing. The continuous  
191 MEG data was then preprocessed off-line with the signal space separation method from the  
192 Maxfilter software (Elekta Oy, Helsinki, Finland) to correct for different head positions across  
193 blocks and to suppress external interference (Taulu et al., 2005).

194

#### 195 *2.5. Data analysis*

196

##### 197 *2.5.1 Preprocessing*

198 Acquired datasets were analysed using the Fieldtrip toolbox (Oostenveld et al., 2011). The  
199 maxfiltered MEG data were highpass-filtered at 1 Hz using a finite impulse response (FIR)  
200 filter (Kaiser window, order 440). For extracting physiological artefacts from the data, 60  
201 principal components were calculated. Via visual inspection, the components displaying eye  
202 movements, heartbeat and external power noise from the nearby train tracks (16.67 Hz) were  
203 removed from the data. We removed on average 2.24 components per participant ( $SD = 0.65$ ).  
204 The data were then lowpass-filtered at 30 Hz and corrected for the delay between the stimulus  
205 computer and the screen inside the chamber (9 ms for each video). We then resampled the  
206 data to 150 Hz and segmented them in 2-second trials to increase the signal-to-noise ratio.

207

## 208 2.5.2 Source projection of MEG data

209 We used either a standard structural brain from the Montreal Neurological Institute (MNI,  
210 Montreal, Canada) or, where possible, the individual structural MRI (20 participants) and  
211 warped it to match the individual's fiducials and head shape as accurately as possible (Mattout  
212 et al., 2007). A 3-D grid with 1-cm resolution and 2982 voxels based on an MNI template brain  
213 was morphed into the brain volume of each participant. This allows group-level averaging and  
214 statistical analysis as all the grid points in the warped grid belong to the same brain region  
215 across subjects. These aligned brain volumes were also used for computing single-shell head  
216 models and leadfields (Nolte, 2003). By using the leadfields and the common covariance  
217 matrix (pooling data from all blocks), a common LCMV beamformer spatial filter was computed  
218 (Veen et al., 1997).

219

## 220 2.5.3 Extraction of lip area, acoustic speech envelope, formants and pitch

221 The lip area of the visual speech was extracted using a MATLAB script adapted from Park et  
222 al. (2016). This data was then upsampled to 150 Hz to match the downsampled preprocessed  
223 MEG signal. The acoustic speech envelope was extracted with the Chimera toolbox from the  
224 audio files corresponding to the videos which constructs nine frequency bands in the range of  
225 100-10000 Hz as equidistant on the cochlear map (Smith et al., 2002). Then the sound stimuli  
226 were band-pass filtered in these bands with a 4th-order Butterworth filter to avoid edge  
227 artefacts. For each of the frequency bands, the envelopes were calculated as absolute values  
228 of the Hilbert transform and then averaged to get the full-band envelope for coherence analysis  
229 (Gross et al., 2013; Keitel et al., 2017). This envelope was then downsampled to 150 Hz to  
230 match the preprocessed MEG signal. The resonant frequencies (or formants) were extracted  
231 using the Burg method implemented in Praat 6.0.48 (Boersma & Weenink, 2019). Up to 5  
232 formants were extracted from each audio file to make sure that the relevant formants were  
233 extracted thoroughly. For analysis purposes, just F2 and F3 were averaged and used. Those  
234 two formants fluctuate around 2500 Hz and tend to merge into a single peak when pronouncing  
235 certain consonant-vowel combinations (Badin et al., 1990). The mentioned merging process  
236 is taking place in the front region of the oral cavity and can therefore also be seen by observing  
237 lip movements (Plass et al., 2020). The formants were extracted at a rate of 200 Hz for the  
238 sake of simplicity and then downsampled to 150 Hz. The pitch (or fundamental frequency,  $f_0$ )  
239 was extracted using the Matlab Audio Toolbox function *pitch.m* with default options (extraction  
240 between 50 and 400 Hz) at a rate of 100 Hz and then upsampled to 150 Hz.

241



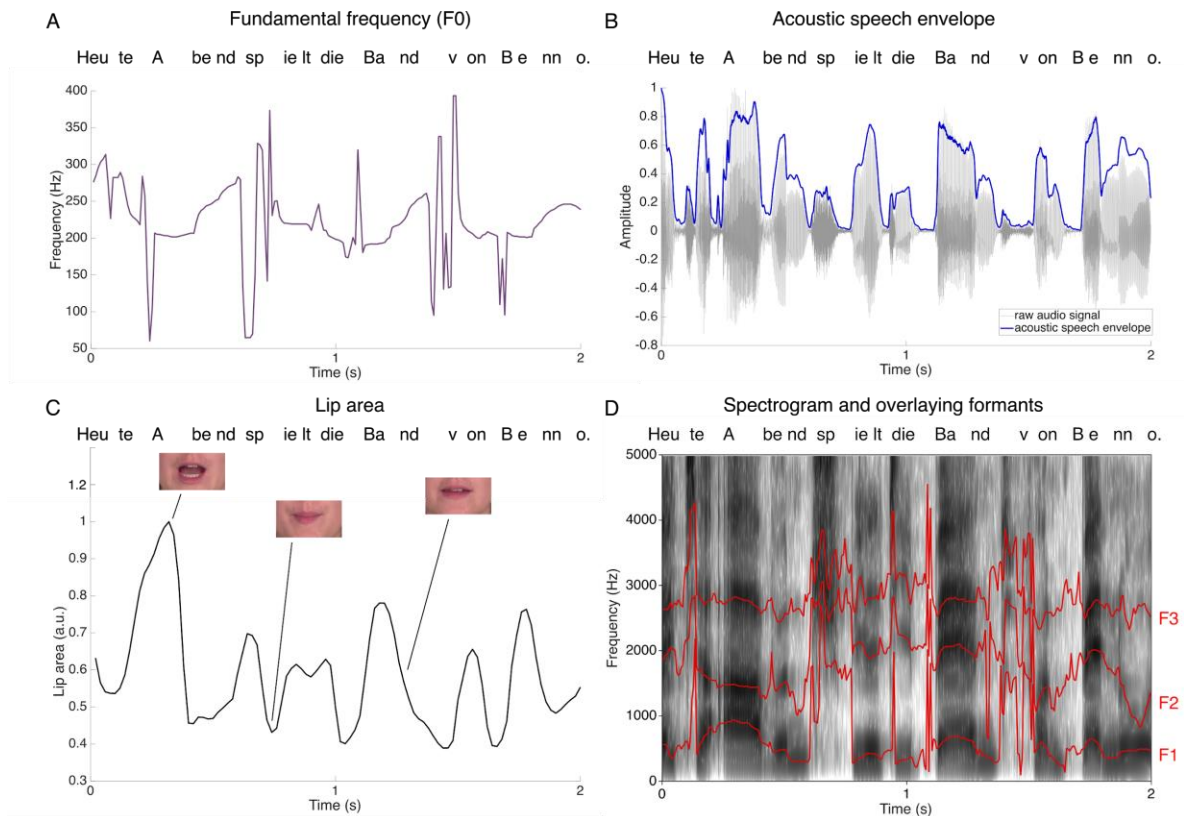

242

243 *Figure 1: Example time series for a 2 second forward section of all the parameters used for*  
244 *coherence calculation. A) Example time series of the fundamental frequency extracted with*  
245 *the pitch.m MATLAB function. B) Example audio signal and the acoustic speech envelope (in*  
246 *blue). C) Lip area extracted from the video frames with the MATLAB script adapted from Park*  
247 *et al. (2016). D) Example spectrogram with overlaying formants (F1-F3, red lines) extracted*  
248 *with Praat.*

249

#### 250 2.5.4 Coherence calculation

251 We calculated the cross-spectral density between the lip area, the unheard acoustic speech  
252 envelope, the averaged F2 and F3 formants and the pitch and every virtual sensor with a multi-  
253 taper frequency transformation (1-25 Hz in 0.5 Hz steps, 3 Hz smoothing). Then we calculated  
254 the coherence between the activity of every virtual sensor and the lip area, the acoustic speech  
255 envelope, the averaged formant curve of F2 and F3 and the pitch curve, which we will refer to  
256 as lip-brain coherence, envelope-brain coherence, formant-brain coherence and pitch-brain  
257 coherence, respectively, in the manuscript.

258

#### 259 2.6 Statistical analysis

260 To test for differences in source space in occipital cortex for forward and backward coherence  
261 values, we extracted all voxels labeled as “occipital cortex” in the Automated Anatomical  
262 Labeling (AAL) atlas (Tzourio-Mazoyer et al., 2002) for a predefined region-of-interest analysis



263 (Hauswald et al., 2018). We then contrasted forward and backward conditions using two-tailed  
264 dependent-samples  $t$ -tests on the averaged coherence values for the frequency bands of  
265 interest (1-7 Hz). This was done separately for the lip-brain coherence, the envelope-brain  
266 coherence, the formant-brain coherence and the pitch-brain coherence. In a first step, we  
267 decided to average over the delta (1-3 Hz) and theta (4-7 Hz) frequency bands since they  
268 carry important information in general on speech processing (phrasal and syllabic processing,  
269 respectively) (Giraud & Poeppel, 2012). Moreover, previous studies investigated lip movement  
270 related activity either in the delta-band (Bourguignon et al., 2020; Park et al., 2016) or the  
271 theta-band (Hauswald et al., 2018), leading us to also do a follow-up analysis separately for  
272 the different frequency bands (described later in this section).

273 To generate a normalized contrast between processing of forward (intelligible) and backward  
274 (unintelligible) lip movements, we subtracted the backward coherence values from the forward  
275 coherence values for our respective measures (lip-brain coherence, unheard speech  
276 envelope-brain coherence, unheard formant-brain coherence and unheard pitch-brain  
277 coherence). From now on, we refer to this normalized contrast as “Intelligibility index”, which  
278 quantifies the differences in coherence between intelligible and unintelligible visual speech.

279 For testing the relationship between the four different intelligibility indices (lip-brain, envelope-  
280 brain, formant-brain and pitch-brain) and age, we conducted a voxelwise correlation with age.

281 To control for multiple comparisons, we used a non-parametric cluster-based permutation test  
282 (Maris & Oostenveld, 2007). Here, clusters of correlation coefficients being significantly  
283 different from zero (showing  $p$ -values  $< 0.05$ ) were identified and their respective  $t$ -values were  
284 extracted and summed up to get a cluster-level test statistic. Random permutations of the data  
285 were then drawn by reordering the behavioural data (in our case age) across participants.  
286 After each permutation, the maximum cluster level  $t$ -value was recorded, generating a  
287 reference distribution of cluster-level  $t$ -values (using a Monte Carlo procedure with 1000  
288 permutations). Cluster  $p$ -values were estimated as the proportion of cluster  $t$ -values in the  
289 reference distribution exceeding the cluster  $t$ -values observed in the actual data. Significant  
290 voxels (which were only found in the correlation between the formant-brain index and age)  
291 were then extracted and averaged for data-driven ROIs (occipital cortex and cingulate cortex)  
292 which were defined using the Automated Anatomical Labeling (AAL) atlas (Tzourio-Mazoyer  
293 et al., 2002). These data-driven ROIs were then applied to all intelligibility indices to make the  
294 ROI analysis comparable. We then fitted four linear models using the function  $lm$  from the  
295 stats package in R to investigate if age could predict the change in the calculated intelligibility  
296 indices and to visualize the statistical effects of the whole brain analysis. To further clarify the  
297 relationship between age and the processing of intelligible and unintelligible lip movements  
298 and to unravel the dynamics in our whole brain correlation analysis, we split our participants  
299 into two groups by the median (young: people  $< 37$ ,  $N=25$ , older: people  $> 37$ ,  $N=25$ ). We then

300 calculated a repeated-measures ANOVA with 2 conditions: age (young vs. older) and  
301 intelligibility (forward vs. backward visual speech) for our data-driven ROIs separately  
302 (occipital cortex and cingulate cortex) using the *stats* package in R. To further investigate the  
303 effects between age and intelligibility, we conducted post-hoc tests with Bonferroni correction  
304 using the function *PostHocTest*. The last step consisted of a follow-up analysis where we  
305 decided to separate the averaged frequency-bands (delta and theta) again to unravel possible  
306 differences of our effect dependent on the frequency-band. We again conducted a voxelwise  
307 correlation with age separately for the delta-band (1-3 Hz) and for the theta-band (4-7 Hz) with  
308 the already described non-parametric cluster-based permutation test for all described  
309 intelligibility indices. Finally, we extracted the values from the voxel with the lowest *t*-value (for  
310 the delta and theta-band, respectively) and fitted a linear model again to investigate if age  
311 could predict the change in the intelligibility indices and to visualize the statistical effects of the  
312 whole brain analysis.

## 313 **3 Results**

314

### 315 **3.1 Behavioural results**

316 We investigated participants' lip reading abilities in a separate experiment that was conducted  
317 before the MEG session. They were presented with silent videos of spoken numbers, words,  
318 and sentences, and the task was to write down what they had understood just from the lip  
319 movements alone. A detailed description of the behavioural task will be published in a  
320 separate paper (Suess et al., 2021). 43 of the 50 participants completed the behavioural  
321 experiment. 4 people had to be excluded because there were problems with the data  
322 acquisition and their answers were not saved. While the recognition rate for the numbers were  
323 high ( $M = 60.83\%$ ,  $SE = 2.93\%$ ), lip reading abilities for complex stimuli (words and sentences)  
324 were low in general (words:  $M = 30.57\%$ ,  $SE = 1.82\%$ ; sentences:  $M = 8.83\%$ ,  $SE = 1.26\%$ ).  
325 Participants had an average total score of  $33.41\%$  ( $SE = 1.75\%$ , Figure 2A). Investigating if  
326 age could predict the total test score revealed that those two variables were uncorrelated ( $F(1,$   
327  $37) = .191$ ,  $p = .664$ ,  $R^2 = -0.021$ ), Figure 2B), showing that in our sample, behavioural lip  
328 reading abilities are not changing with age. This is consistent with our study on general lip  
329 reading abilities in the German language (Suess et al., 2021), but different to other studies  
330 indicating higher lip reading abilities in younger individuals (Feld & Sommers, 2009; Tye-  
331 Murray et al., 2007b). Participants also completed a questionnaire on subjective hearing  
332 impairment (APHAB, Löhler et al., (2014)). Further investigating the relationship between  
333 subjective hearing impairment and test score also revealed no significant effect ( $F(1, 37) =$   
334  $.104$ ,  $p = .75$ ,  $R^2 = -0.024$ ) in the current sample. This is in line with studies investigating  
335 hearing impairment in older adults (Tye-Murray et al., 2007a), but not supporting our own  
336 results which show a relationship between self-reported hearing impairment and lip reading  
337 abilities (Suess et al., 2021). However, as the current study was aiming to test normal hearing  
338 individuals with restricted variance in hearing impairment, those results cannot be compared  
339 directly to Suess et al. (2021), which also included individuals with severe hearing loss as well  
340 as prelingually deaf individuals.

341

### 342 **3.2 Visuo-phonological transformation is carried by both tracking of global envelope** 343 **and spectral fine-details during presentation of intelligible silent lip movements**

344 We calculated the coherence between the MEG data and the lip envelope, the unheard  
345 acoustic speech envelope, the unheard resonant frequencies and the unheard pitch (from now  
346 on called lip-brain coherence, envelope-brain coherence, formant-brain coherence, and pitch-  
347 brain coherence, respectively). As the visuo-phonological transformation process is likely  
348 taking place in visual areas (Hauswald et al., 2018), we defined the occipital cortex using the  
349 AAL atlas (Tzourio-Mazoyer et al., 2002) as a predefined region-of-interest and averaged over

350 all voxels from this ROI. We then compared the mean for the coherence of the presented  
351 forward videos (intelligible lip movements) with the mean of the presented backward videos  
352 (unintelligible lip movements) separately for the lip-brain coherence, the envelope-brain  
353 coherence, the formant-brain coherence and the pitch-brain coherence. While there was no  
354 significant difference in lip-brain coherence for intelligible and unintelligible visual speech ( $t(49)$   
355 = 0.396,  $p = 0.694$ ,  $d = 0.056$ ), we found a significant difference in unheard envelope-brain  
356 coherence for intelligible and unintelligible visual speech ( $t(49) = 2.679$ ,  $p = 0.01$ ,  $d = 0.379$ ).  
357 Most importantly, we found a significant difference also for the unheard formant-brain  
358 coherence ( $t(49) = 2.039$ ,  $p = 0.047$ ,  $d = 0.288$ ) and for the unheard pitch-brain coherence for  
359 intelligible and unintelligible visual speech ( $t(49) = 2.91$ ,  $p = 0.005$ ,  $d = 0.411$ , all in Figure 2C).  
360 The results on the tracking of lip movements are in line with former findings, showing that the  
361 visual cortex tracks these regardless of intelligibility, but point to different tracking properties  
362 dependent on the intelligibility of the unheard speech envelope. Interestingly, we show here  
363 that the visual cortex is also able to distinguish between unheard intelligible and unintelligible  
364 formants (or resonant frequencies) and pitch (or F0) modulations extracted from the  
365 spectrogram, showing that also unheard intelligible spectral details are extracted from visual  
366 speech and represented at the level of the visual cortex.

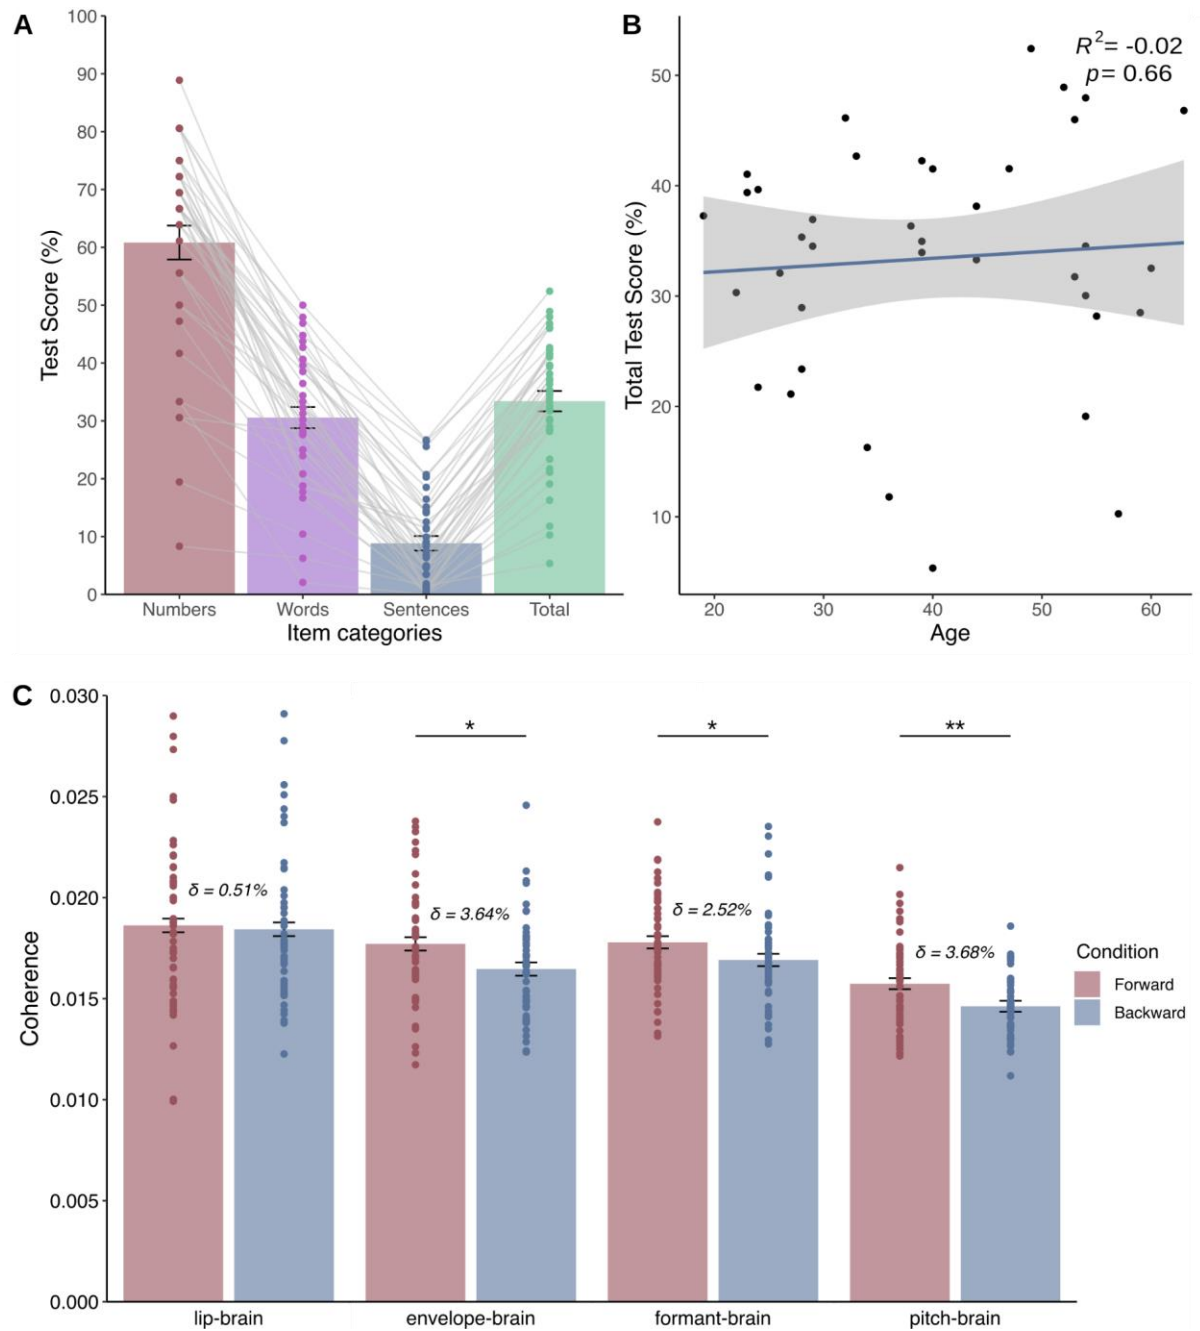

367

368

369 *Figure 2: Behavioural data and comparison of information tracking in visual cortex. A)*

370 *Behavioural lip reading abilities. Participants recognized numbers the most, followed by words*

371 *and sentences. B) Correlation between age and total test score revealed no significant*

372 *correlation ( $p = 0.66$ ), suggesting that lip reading abilities do not change with age. Blue line*

373 *depicts regression line, shaded areas depict standard error of mean (SE). C) Mean values*

374 *extracted from all voxels in occipital cortex showing no significant differences in lip-brain*

375 *coherence ( $p = 0.694$ ), but showing significant differences in unheard envelope-brain*

376 *coherence ( $p = 0.01$ ), formant-brain coherence ( $p = 0.047$ ) and unheard pitch-brain coherence*

377 *( $p = 0.005$ ) between forward and backward presentation of visual speech. Error bars represent*

378 1 standard error of mean for within-subject designs (O'Brien & Cousineau, 2014),  $\delta$  indicates  
379 the relative change between forward and backward conditions in percent.

380

### 381 **3.3 Spectral fine-detail tracking rather than global envelope tracking is altered in the** 382 **ageing population**

383 We were then interested in how the visuo-phonological transformation process is influenced  
384 by age. So we calculated a voxelwise correlation between the intelligibility index (difference  
385 between coherence for forward videos and coherence for backward videos) separately for our  
386 coherence indices (lip-brain, envelope-brain, formant-brain and pitch-brain) and the age of the  
387 participants. We neither found a significant correlation between the intelligibility index of the  
388 lip-brain coherence and age ( $p = 1$ , cluster-corrected) nor between the intelligibility index of  
389 the unheard envelope-brain coherence and age ( $p = 0.09$ , cluster-corrected). Also, the  
390 correlation between the intelligibility index of the unheard pitch-brain coherence was  
391 statistically not significant ( $p = 0.07$ , cluster-corrected). However, the overall trend for the  
392 envelope-brain and the pitch-brain coherence was to decline with age. Interestingly, we did  
393 find a significant negative correlation between the intelligibility index of the unheard formant-  
394 brain coherence and age ( $p = 0.002$ , cluster-corrected), strongest in occipital cortex and  
395 cingulate cortex (lowest  $t$ -value:  $-4.124$ , MNI  $[40 -90 0]$ , Figure 3A). To further investigate the  
396 effects, we extracted the voxels showing a statistical effect in our whole brain analysis (Figure  
397 3A) and divided them into occipital voxels and voxels from the cingulate cortex using the AAL  
398 atlas (Tzourio-Mazoyer et al., 2002).

399 To investigate how strong the relationship between age and the different intelligibility indices  
400 is in our ROIs, we fitted four separate linear models. We started with the lip-brain index to  
401 exclude the possibility that our effect is due to visual processing. We found that age could not  
402 predict the lip-brain intelligibility index in any of the chosen ROIs (occipital cortex:  $F(1, 48) =$   
403  $0.124$ ,  $p = 0.727$ ,  $\eta^2 = 0.002$ , Figure 3C; cingulate cortex:  $F(1, 48) = 0.825$ ,  $p = 0.368$ ,  $\eta^2 =$   
404  $0.017$ , Figure 3F). On the contrary, we found that age could significantly predict the decrease  
405 in the formant-brain intelligibility index in both occipital areas ( $F(1, 48) = 33.59$ ,  $p = 5.14e-07$ ,  
406  $\eta^2 = 0.412$ , Figure 3B) and cingulate cortex ( $F(1, 48) = 26.42$ ,  $p = 4.99e-06$ ,  $\eta^2 = 0.355$ , Figure  
407 3E), suggesting an altered tracking process for the formants in ageing. Further fitting linear  
408 models to investigate the effects in our ROIs for the envelope-brain coherence and the pitch-  
409 brain coherence revealed that age could not significantly predict the envelope-brain index in  
410 occipital ( $F(1, 48) = 1.638$ ,  $p = 0.207$ ,  $\eta^2 = 0.033$ ) or cingulate cortex ( $F(1, 48) = 0.681$ ,  $p =$   
411  $0.413$ ,  $\eta^2 = 0.014$ ) and also not the pitch-brain index in occipital cortex ( $F(1, 48) = 2.584$ ,  $p =$   
412  $0.114$ ,  $\eta^2 = 0.051$ ). However, age could significantly predict the pitch-brain index in cingulate  
413 cortex ( $F(1, 48) = 6.972$ ,  $p = 0.011$ ,  $\eta^2 = 0.127$ ). The lack of tracking differences between  
414 intelligible and unintelligible lip movements suggests that the visual cortex processes basic



415 visual properties of lip movements, but that there are differential processing strategies for  
 416 acoustic information associated with these lip movements. These results also suggest that  
 417 processing of the pitch (or fundamental frequency) is altered to some extent in the ageing  
 418 population, at least in cingulate cortex. In summary, the correlation between the envelope-  
 419 brain index and age and the pitch-brain index and age seem to show a tendency in line with  
 420 the relationship between the formant-brain index and age in the whole brain analysis. We see  
 421 that effect sizes are biggest for the formant-brain index (occipital  $\eta^2 = 0.412$ , cingulate  $\eta^2 =$   
 422  $0.355$ ), followed by the pitch-brain index (occipital  $\eta^2 = 0.051$ , cingulate  $\eta^2 = 0.127$ ). Lower  
 423 effect sizes are found for the envelope-brain index (occipital  $\eta^2 = 0.033$ , cingulate  $\eta^2 = 0.014$ )  
 424 and the lip-brain index (occipital  $\eta^2 = 0.002$ , cingulate  $\eta^2 = 0.017$ ) after extracting voxels from  
 425 the data-driven ROI, adding to the evidence of a differential processing of speech properties  
 426 in age.  
 427

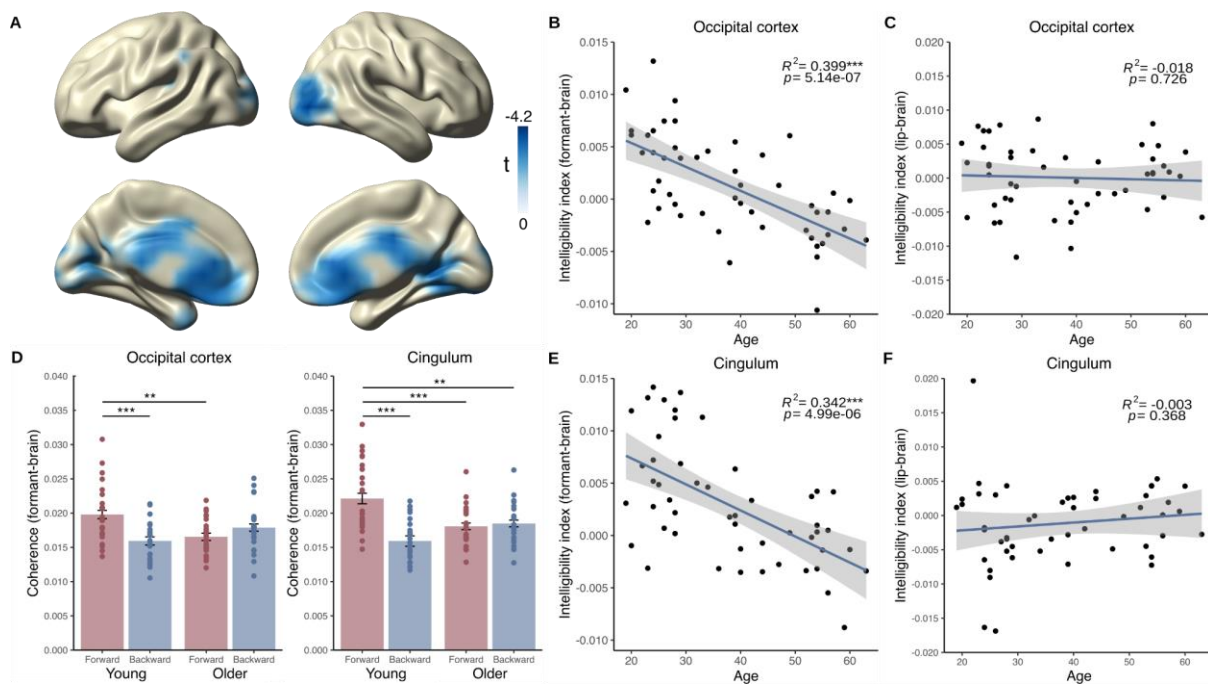

428  
 429 *Figure 3: Correlation between age and intelligibility index (i.e. difference in forward vs.*  
 430 *backward tracking) and comparison of age-groups. A) Statistical values of the voxelwise*  
 431 *correlation of the intelligibility index (forward formant-brain coherence - backward formant-*  
 432 *brain coherence) with age (averaged over 1-7 Hz,  $p < 0.05$ , cluster-corrected) showing a*  
 433 *strong decrease of intelligibility tracking in occipital regions and in cingulate cortex. B)*  
 434 *Correlation of formant-brain intelligibility index in significant occipital voxels extracted from A*  
 435 *showing a significant correlation with age ( $p = 5.14e-07$ ). C) Correlation of lip-brain intelligibility*  
 436 *index in significant occipital voxels extracted from A showing a not significant correlation with*  
 437 *age ( $p = 0.726$ ). D) Formant-brain coherence separated for age and for forward and backward*  
 438 *presented visual speech for different ROIs. Coherence values from occipital cortex indicating*

439 *significant differences between forward and backward tracking in the young group ( $p =$*   
440  *$0.0004$ ), but not in the older group ( $p = 0.467$ ), and also a difference between forward tracking*  
441 *in the young group and forward tracking in the older group ( $p = 0.004$ ). Coherence values from*  
442 *cingulum indicating significant differences between forward and backward tracking in the*  
443 *young group ( $p = 1.1e-07$ ), but not in the older group ( $p = 1.000$ ), and also a difference*  
444 *between forward tracking in the young group and forward tracking in the older group ( $p =$*   
445  *$0.0005$ ). Additional significant effects were observed between the forward tracking in the*  
446 *young group and the backward tracking in the older group ( $p = 0.002$ ). E) Correlation of*  
447 *formant-brain intelligibility index in significant voxels from cingulate cortex extracted from A*  
448 *showing a significant correlation with age ( $p = 4.99e-06$ ). F) Correlation of lip-brain intelligibility*  
449 *index in significant voxels from cingulate cortex extracted from A showing a not significant*  
450 *correlation with age ( $p = 0.368$ ). Blue lines depict regression lines, shaded areas depict*  
451 *standard error of mean (SE).*

452

### 453 **3.4 Intelligibility effects are mainly carried by young individuals**

454 To unravel the effects explained in sections 3.3, we reassessed the coherence values  
455 separately for forward and backward speech with respect to the age of our participants. Thus,  
456 we decided to split our sample into two age groups (younger vs. older) and calculated a 2x2  
457 ANOVA on the averaged voxels that we extracted from figure 3A for the former calculated  
458 formant-brain coherence (for forward and backward coherence, respectively). We again  
459 separated them into two ROIs (occipital cortex and cingulate cortex) and calculated for each  
460 an ANOVA with the factors age (young vs. older) and intelligibility (forward formant-brain  
461 coherence vs. backward formant-brain coherence). We did not find a main effect of age in  
462 occipital cortex ( $F(1, 49) = 0.981, p = 0.324$ ), but a main effect close to significance threshold  
463 of intelligibility ( $F(1, 49) = 3.627, p = 0.059$ ). We also found a distinct interaction effect between  
464 age and intelligibility ( $F(1, 49) = 15.723, p = 0.0001$ , Figure 3D, occipital cortex). To further  
465 investigate the interaction effect, we calculated a post-hoc test with Bonferroni correction,  
466 which revealed a significant difference between the forward and backward conditions in the  
467 young group ( $p = 0.0004$ ), but not in the older group ( $p = 0.467$ ). Furthermore, we discovered  
468 a significant difference between the forward condition in the young group and the forward  
469 condition in the older group ( $p = 0.004$ ), exhibiting that the young group is able to track the  
470 forward speech stronger than the older group. In cingulate cortex, we also did not find a main  
471 effect of age ( $F(1, 49) = 1.399, p = 0.239$ ), but here we found a main effect of intelligibility ( $F(1,$   
472  $49) = 16.474, p = 0.0001$ ). We also found a distinct interaction effect between age and  
473 intelligibility ( $F(1, 49) = 21.536, p = 1.1e-05$ , Figure 4D, cingulum). The Bonferroni corrected  
474 post-hoc test also revealed a significant difference between the forward and backward  
475 conditions in the young group ( $p = 1.1e-07$ ), but not in the older group ( $p = 1.000$ ). Additionally,

476 we found a significant difference between the forward condition in the young group and the  
477 forward condition in the older group ( $p = 0.0005$ ), strengthening our observation that the young  
478 group is able to distinguish more faithfully between forward and backward speech than the  
479 older group. In the cingulate cortex, we also found a significant difference between the forward  
480 condition in the young group and the backward condition in the older group ( $p = 0.002$ ). Here,  
481 we observe an additional effect in the older group, conveying that the ageing brain fails to  
482 distinguish between intelligible and unintelligible speech, and even exhibits a reverse pattern  
483 by tracking the presented backward speech more than the young group.

484

### 485 **3.5 Different frequency-bands show an age-related decline in different brain regions**

486 As a last step, we investigated if different frequency bands are impacted differently by age-  
487 related decline. Therefore, we repeated the analysis steps explained in 3.3, meaning that we  
488 calculated again a voxelwise correlation between the intelligibility index separately for our  
489 coherence conditions (lip-brain, envelope-brain, formant-brain and pitch-brain) and the age of  
490 the participants, but this time separately for the delta-band (1-3 Hz) and the theta-band (4-7  
491 Hz). For the delta-band, we again found a significant correlation between age and the  
492 intelligibility index just for the formant-brain index ( $p = 0.002$ , cluster-corrected). This effect  
493 was strongest in cingulate cortex (lowest  $t$ -value:  $-4.991$ , MNI [0 40 10], Figure 4A). No  
494 correlation occurred between age and the other indices (lip-brain index:  $p = 0.833$ ; envelope-  
495 brain index:  $p = 0.268$ ; pitch-brain index:  $p = 0.166$ , all cluster-corrected). Repeating the  
496 analysis for the theta-band revealed a similar picture: While we could find a significant  
497 correlation between the formant-brain index and age ( $p = 0.018$ , cluster-corrected) which was  
498 strongest in visual cortex (lowest  $t$ -value:  $-4.394$ , MNI [40 -90 0], Figure 4B), we did not find it  
499 for the remaining indices and age (lip-brain index:  $p = 1$ ; envelope-brain index:  $p = 0.096$ ;  
500 pitch-brain index:  $p = 0.675$ , all cluster-corrected). These results display a differential spatial  
501 pattern for different frequency bands: While tracking of intelligible speech in the theta-band  
502 declines reliably in visual cortex, tracking of the slower delta-band rather declines in cingulate  
503 cortex and frontal areas. We then extracted the values from the voxel with the lowest  $t$ -value  
504 (i.e. the most significant negative one) respectively for both frequency bands (delta-band:  
505 cingulate cortex, MNI [0 40 10]; theta-band: visual cortex, MNI [40 -90 0]) and again fitted a  
506 linear model for the formant-brain index to further clarify the effects found in the whole brain  
507 analysis. Age could significantly predict the formant-brain index in the delta-band in cingulate  
508 cortex ( $F(1, 48) = 24.4$ ,  $p = 9.885e-06$ ,  $\eta^2 = 0.337$ , Figure 4C) and in the theta-band in visual  
509 cortex ( $F(1, 48) = 18.92$ ,  $p = 7.089e-05$ ,  $\eta^2 = 0.282$ , Figure 4D). To further clarify if the tested  
510 relationship is specific to a certain frequency band and brain region, we also tested the vice  
511 versa relationship (i.e. the relationship between age and theta-band in cingulate cortex and  
512 the relationship between age and delta-band in occipital cortex). We found that while age could

513 not significantly predict the formant-brain index in the theta-band in cingulate cortex ( $F(1, 48)$   
514  $= 0.637$ ,  $p = 0.429$ ,  $\eta^2 = 0.01$ , Figure 4E), it could significantly predict the formant-brain index  
515 in the delta-band in occipital cortex ( $F(1, 48) = 6.757$ ,  $p = 0.012$ ,  $\eta^2 = 0.123$ , Figure 4F). This  
516 suggests that while the ability of the cingulate cortex to transform visual into phonological  
517 information declines just in the delta-band, the occipital cortex shows a decline over a broad  
518 range of frequencies and therefore in general visual speech processing.

519  
520

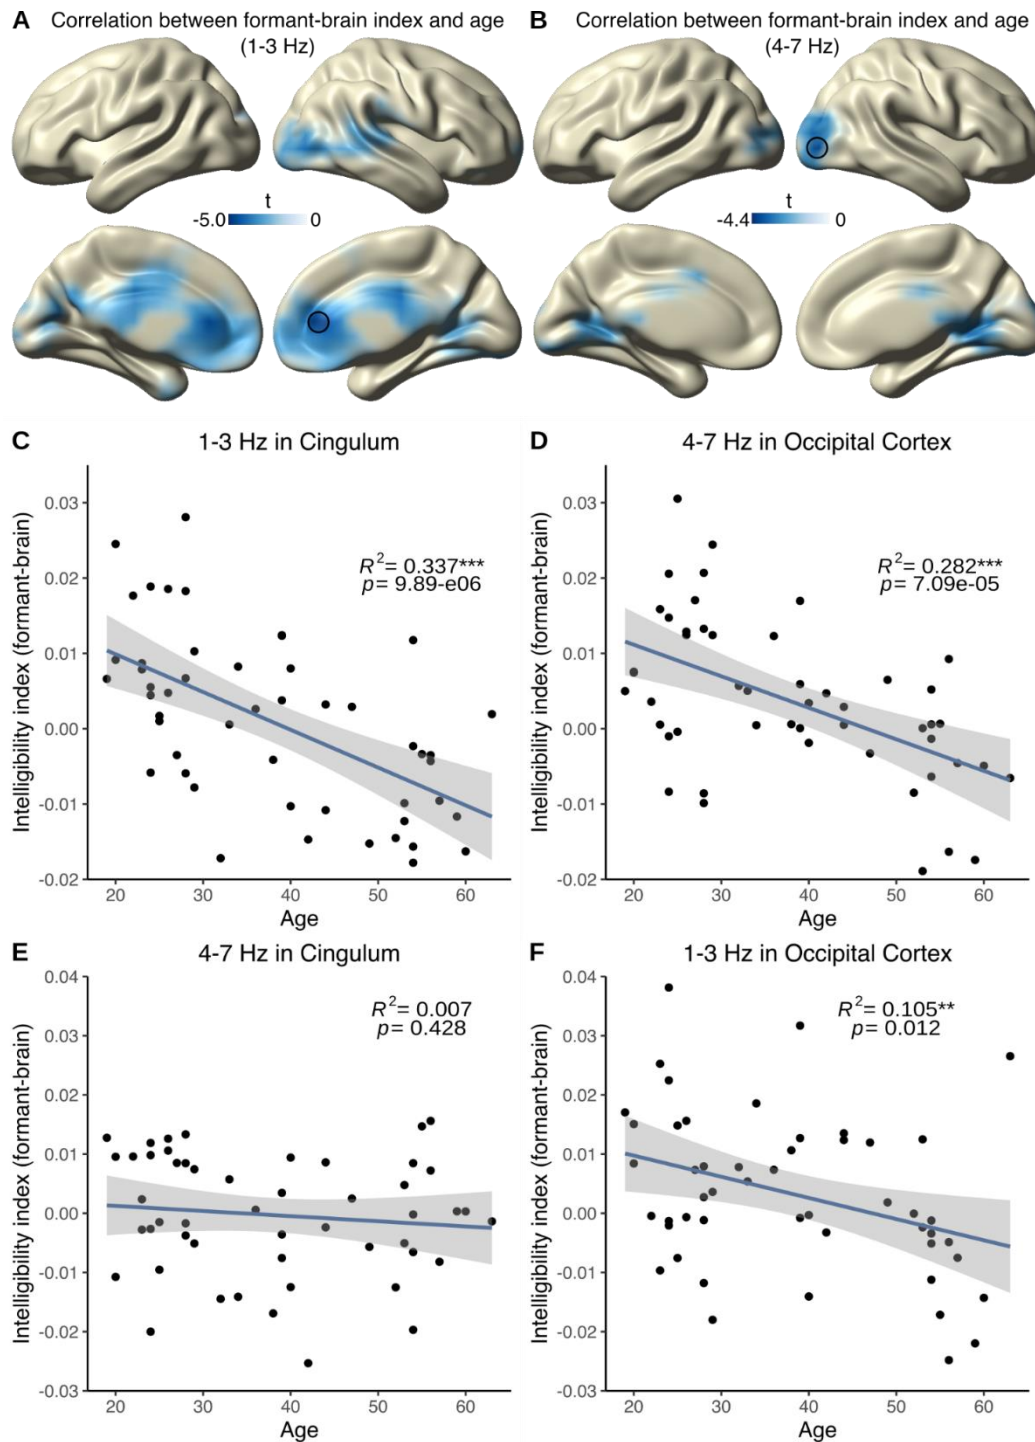

521 *Figure 4: Statistical values of the voxelwise correlation of the formant-brain index with age split*  
522 *between delta-band and theta-band. A) Tracking of the intelligibility index in the delta-band (1-*  
523 *3 Hz,  $p < 0.05$ , cluster-corrected) indicates a strong decrease of intelligibility tracking in*  
524 *cingulate cortex and frontal areas. Black circle indicates lowest t-value extracted for C and F.*  
525 *B) Tracking of the intelligibility index in the theta-band (4-7 Hz,  $p < 0.05$ , cluster-corrected)*  
526 *indicates a strong decrease of intelligibility tracking in visual areas. Black circle indicates*  
527 *lowest t-value extracted for D and E. C) Correlation of formant-brain intelligibility index in the*  
528 *voxel with the lowest t-value extracted from A (cingulate cortex) showing a significant decrease*  
529 *with age ( $p = 9.885e-06$ ) in the delta-band. D) Correlation of formant-brain intelligibility index*  
530 *in the voxel with the lowest t-value extracted from B (visual cortex) showing a significant*  
531 *decrease with age ( $p = 7.089e-05$ ) in the theta-band. E) Correlation of formant-brain*  
532 *intelligibility index in the voxel with the lowest t-value extracted from A (cingulate cortex)*  
533 *showing no significant decrease with age ( $p = 0.428$ ) in the theta-band. F) Correlation of*  
534 *formant-brain intelligibility index in the voxel with the lowest t-value extracted from B (occipital*  
535 *cortex) showing a significant decrease with age ( $p = 0.012$ ) also in the delta-band. Blue lines*  
536 *depict regression lines, shaded areas depict standard error of mean (SE).*



#### 537 **4 Discussion**

538 Our study illustrates that during lip reading, the visual cortex represents multiple features of  
539 the speech signal in low frequency bands (1-7 Hz), importantly including the corresponding  
540 (unheard) acoustic signal. It has previously been shown that the visual cortex is able to track  
541 the intelligible global envelope (unheard acoustic speech envelope; Hauswald et al. 2018).  
542 We demonstrate here that the visual cortex is also able to track the modulation of intelligible  
543 spectral fine-details (unheard formants and pitch). Furthermore, we found that ageing is  
544 associated with a deterioration of this ability not only in the visual cortex, but also in the  
545 cingulate cortex. Disentangling delta and theta-band revealed that while the age-related  
546 decline of formant tracking is independent of frequency bands in visual cortex, it is unique in  
547 cingulate cortex for the delta-band. Our results suggest that visuo-phonological transformation  
548 processes are sensitive to age-related decline, in particular with regards to the modulation of  
549 unheard spectral fine-details.

550

#### 551 ***Visuo-phonological transformation processes are observable for global amplitude*** 552 ***modulations and spectral-fine detail modulations***

553 As expected, the current study replicates the main finding from Hauswald et al. (2018) showing  
554 a visuo-phonological transformation process in visual cortex for the unheard speech envelope  
555 in an Italian speaking sample. Our study using a German speaking sample suggests that the  
556 postulated visuo-phonological transformation process at the level of the visual cortex is  
557 generalizable across languages. This is unsurprising as it is in line with studies on the speech  
558 envelope spectrum which show robust amplitude peaks between 3.5 and 4.5 Hz regardless of  
559 language (Poeppel & Assaneo, 2020), providing evidence that different languages carry  
560 similar temporal regularities not only for auditory properties, but also for visual properties  
561 (Chandrasekaran et al., 2009). We argue that this similarity is a key property for making the  
562 postulated visuo-phonological transformation process transferable to other languages.

563 By investigating different properties of auditory speech (global modulations vs. fine-detailed  
564 modulations) and how they are tracked by the human brain, our results are furthermore adding  
565 an important part to the understanding of how visual speech contributes to speech processing  
566 in general. As lip movements and amplitude modulations are highly correlated  
567 (Chandrasekaran et al., 2009), it is highly probable that amplitude modulations can be inferred  
568 by lip movements alone as a learned association. Here we can show that the brain is also able  
569 to perform a more fine-coarsed tracking than initially thought by especially processing the  
570 spectral fine-details that are modulated near the lips, another potentially learned association  
571 between lip-near auditory cues (i.e. merged F2 and F3 formants) and lip movements (Plass et  
572 al., 2020). Additionally, it is not only formants that are subject to visuo-phonological  
573 transformation, but also the fundamental frequency, as seen in our results. This is in line with



574 a recent study which shows that closing the lips is correlated with the tone falling (Garg et al.,  
575 2019). How those modulations are influenced by behavioural measures still needs to be  
576 discussed. Some studies suggest that enhanced lip reading abilities go in line with higher  
577 activation in visual areas in persons with a cochlear implant (e.g. Giraud et al., 2001). Our  
578 present results do not suggest that strong visuo-phonological transformation processes are  
579 sufficient for improved lip reading abilities. Yet, they may be most useful in disambiguating  
580 auditory signals in difficult listening situations.

581

582 ***Tracking of unheard formants accompanying lip movements is mostly affected in***  
583 ***ageing***

584 With regards to the ageing effect, we could show that various neural tracking mechanisms are  
585 differentially affected. Our study presents that tracking of unheard formants, especially the  
586 combined F2 and F3 formants, is declining with age, while there is still a preserved tracking of  
587 purely visual information (as seen in the lip-brain index, Figures 3C and 3F). Meanwhile, the  
588 tracking of the unheard speech envelope and pitch signify an inconclusive picture: While  
589 tracking of those properties seem to be preserved to some extent, both are showing a  
590 tendency to diminish with age.

591 Especially the formants and the pitch are part of the temporal fine-structure (TFS) of speech  
592 and are crucial for speech segregation or perceptual grouping for optimal speech processing  
593 in complex situations (Alain et al., 2017; Bregman et al., 1990). The TFS is different from the  
594 acoustic envelope in a sense that it does not display “coarse” amplitude modulations of the  
595 audio signal but rather fluctuations that are close to the centre frequency of certain frequency  
596 bands (Lorenzi et al., 2006). Hearing-impaired older participants show a relative deficit of the  
597 representation of the TFS compared to the acoustic envelope (Anderson et al., 2013; Lorenzi  
598 et al., 2006). The TFS also yields information when trying to interpret speech in fluctuating  
599 background noise (Moore, 2008). Other studies also point to the fact that especially when  
600 having cochlear hearing loss along with a normal audiometric threshold, the interpretation of  
601 the TFS is reduced, resulting in diminished speech perception under noisy conditions (Lorenzi  
602 et al., 2009). This suggests that hearing-impaired subjects mainly seem to rely on the temporal  
603 envelope to interpret auditory information (Moore & Moore, 2003), while normal hearing  
604 subjects can also use the presented temporal fine-structure. Interestingly, we found that even  
605 when the TFS is inferred from lip movements, there is a decline in the processing of spectral  
606 fine-details with age independent of hearing loss. Our results suggest that the visuo-  
607 phonological transformation of certain spectral fine-details like the formants are impacted the  
608 most in ageing, whereas the transformation of the pitch (or fundamental frequency) reveals a  
609 more complex picture: We find preserved tracking of the unheard pitch contour in occipital  
610 cortex, but a decline with age in the cingulate cortex. Interestingly, the cingulate cortex has

611 been found to show higher activation as response to processing of degraded speech (Erb &  
612 Obleser, 2013), pointing to a possible compensatory mechanism when processing distorted  
613 speech. How this altered processing of the unheard pitch (or fundamental frequency)  
614 accompanying lip movements in cingulate cortex has an impact on speech understanding  
615 needs to be discussed in further studies.

616 Further investigating the effects shown in our correlational analysis revealed that older  
617 participants seem to be less able to distinguish between forward and backward unheard  
618 speech (unheard formants) and that younger individuals show enhanced tracking of intelligible  
619 speech (Figure 3D). This could point to the fact that the older population is losing the gain of  
620 differentiating intelligible from unintelligible speech, obviously resulting in a less successful  
621 visuo-phonological transformation process. Other studies suggest that the older population  
622 seems to inefficiently use their cognitive resources, showing less deterioration of cortical  
623 responses (measured by the envelope reconstruction accuracy) to a foreign language  
624 compared to younger individuals (Presacco et al., 2016b) and also an association between  
625 cognitive decline and increased cortical envelope tracking or even higher synchronization of  
626 theta (Goossens et al., 2016). Auditory processing is also affected both in midbrain and cortex  
627 in age, exhibiting a large reduction of speech envelope encoding when presented with a  
628 competing talker, but at the same time a cortical overrepresentation of speech regardless of  
629 the presented noise, suggesting an imbalance between inhibition and excitation in the human  
630 brain (Presacco et al., 2016a) when processing speech. Other studies add to this hypothesis  
631 by showing decreasing alpha modulation in the ageing population (Henry et al., 2017; Vaden  
632 et al., 2012), strengthening the assumption that there is an altered interaction between age  
633 and cortical tracking even in the visual modality that needs to be investigated further.

634 Considering all acoustic details accompanying lip movements we still see a tendency of the  
635 speech envelope tracking to decline with age, suggesting that the transformation of the global  
636 speech dynamics could also be deteriorating. Overall, our results provide evidence that the  
637 transformation of fine-grained acoustic details seem to decline more reliably with age, while  
638 the transformation of global information (in our case the speech envelope) seems to be less  
639 impaired.

640

#### 641 ***Possible implications for speech processing in challenging situations***

642 Our findings raise the question of how the decline in processing of unheard spectral fine-  
643 details negatively influences other relevant aspects of hearing. In light of aforementioned  
644 studies from the auditory domain of speech processing, we propose some thoughts on the  
645 multi-sensory nature of speech and how different sensory modalities can contribute to speech  
646 processing abilities under disadvantageous conditions (both intrapersonal and  
647 environmental).

648 As mentioned in the previous section, optimal hearing requires processing of both the temporal  
649 fine structure and the global acoustic envelope. However, especially under noisy conditions,  
650 processing the TFS becomes increasingly important for understanding speech. Ageing in  
651 general goes along with reduced processing of the TFS (Anderson & Karawani, 2020) and  
652 this deteriorating effect seems to be even more detrimental when ageing is accompanied by  
653 hearing loss (Anderson et al., 2013). Since listening in natural situations usually is a multi-  
654 sensory (audiovisual) phenomenon, we argue that the impaired visuo-phonological  
655 transformation process of the TFS adds to the difficulties of older (also audiometrically normal  
656 hearing) individuals to follow speech in challenging situations. To follow up this idea, future  
657 studies will need to quantify the benefit of audiovisual versus (unimodal) auditory processing,  
658 depending on different visuo-phonological transformation abilities.

659 Our results also have implications for listening situations when relevant visual input from the  
660 mouth area is obscured, a topic which has gained enormously in significance due to the wide  
661 adoption of face masks to counteract the spread of SARS-CoV-2. In general, listening  
662 becomes more difficult and performance declines when the mouth area is obscured (Brown et  
663 al., 2021; Giovanelli et al., 2021). While face masks may diminish attentional focusing as well  
664 as temporal cues, our work suggests that they also deprive the brain of deriving the acoustic  
665 TFS from the lip movements especially in the formant frequency range which are modulated  
666 near the lips (F2 and F3). This issue, which should become relevant particularly in noisy  
667 situations, may be aggravated by the fact that face masks (especially highly protective ones)  
668 impact sound propagation of frequencies between 1600-6000 Hz with a peak around 2000 Hz  
669 (Caniato et al., 2021). Thus, face masks diminish relevant formant information in both sensory  
670 modalities. This could disproportionately affect hearing impaired listeners, an urgent question  
671 that should be followed up by future studies.

672 Overall, considering both the auditory and visual domain of speech properties, we suggest  
673 that the underlying cause of speech processing difficulties in naturalistic settings  
674 accompanying age or hearing impairment is more diverse than previously thought. The visual  
675 system provides the proposed visuo-phonological transformation process as an important  
676 mechanism for optimal speech understanding and crucially supports acoustic speech  
677 processing.

678

679 ***Occipital cortex and cingulate cortex show different tracking properties dependent on***  
680 ***the frequency-band***

681 With regards to different frequency bands, our results could yield important insights into  
682 different brain regions showing distinct formant tracking properties: While we find a robust  
683 decline of delta-band tracking with age in both occipital and cingulate cortex, theta-band  
684 tracking is reliably declining only in occipital areas. In general, theta is corresponding to the

685 frequency of syllables and to the modulations in the amplitude envelope (Gross et al., 2013;  
686 Keitel et al., 2018; Meyer, 2018; Poeppel & Assaneo, 2020), whereas delta seems to process  
687 phrasal chunks based on acoustic cues (Ghitza, 2017; Keitel et al., 2018) and is therefore  
688 responsible for a general perceptual chunking mechanism (Boucher et al., 2019). Our results  
689 also show that the visual cortex extracts information provided by the perception of the lip  
690 movements and connects them with phonological information that is already learned. This  
691 points to a possible top-down influence of stored syntactic information provided by delta-band  
692 tracking, which also seems to be deteriorating with increasing age both in occipital and  
693 cingulate cortex. Interestingly, age-related hearing loss also leads to a volume reduction in  
694 anterior cingulate cortex (Slade et al., 2020), which in turn also leads to more memory  
695 impairments and cognitive deficits (Belkhiria et al., 2019). These and our current results  
696 strengthen the notion that the cingulate cortex has an important function also in visual speech  
697 processing, as this also goes in line with the mentioned compensatory mechanism in anterior  
698 cingulate cortex (ACC) (Erb & Obleser, 2013). Together with the findings of the current study,  
699 this involvement of the cingulate cortex in speech processing (or in general the cingulo-  
700 opercular network; Peelle (2018)) underlines the fact that there seems to be a maladaptive  
701 processing strategy in frontal areas. To fully understand the mechanisms behind this visuo-  
702 phonological transformation process without the influence of ageing in distinct brain regions  
703 and frequency bands, it would be advisable for future studies to focus on younger individuals,  
704 especially since this study is the first to investigate the tracking of spectral fine-details  
705 extracted from the spectrogram.

706 **5 Conclusion**

707 The current study demonstrates that the visual cortex is able to track intelligible unheard  
708 spectral-fine detailed information just by observing lip movements. Crucially, we present a  
709 differential pattern for the processing of global (i.e. envelope) and spectral fine-detailed  
710 intelligible information, with ageing affecting in particular tracking of spectral speech  
711 information (or the TFS), while showing partly preserved tracking of global modulations.  
712 Furthermore, we see a distinct age-related decline of tracking dependent on the brain region  
713 (i.e. visual and cingulate cortex) and on the frequency-band (i.e. delta and theta-band). The  
714 results presented here may have important implications for hearing in the ageing population,  
715 suggesting that hearing difficulties could also be exacerbated in natural audiovisual  
716 environments as a result of reduced capacities of visual benefit. With respect to the current  
717 pandemic situation, our results can provide a novel important insight on how missing visual  
718 input (e.g. when carrying face masks) is critical for speech comprehension.

719 **6 Competing Interest Statement**

720 The authors have declared no competing interest.

721

722 **7 Acknowledgements**

723 This work is supported by the Austrian Science Fund, P31230 (“Audiovisual speech  
724 entrainment in deafness”).

725

726 **8 Pre-registration**

727 The first part of the study analyses was pre-registered prior to the research being conducted  
728 under <https://osf.io/ndvf6/>.

729

730 **9 Data availability**

731 The “mat” and “csv” files containing the data shown in the figures, along with the MATLAB  
732 code and the R code to recreate the plots, are available under <https://osf.io/ndvf6/>. Readers  
733 seeking access to the original, non-resampled data (~430 GB) should contact the lead  
734 author (nina.suess@sbg.ac.at). Access will be granted in accordance with ethical  
735 procedures governing the reuse of sensitive data.



736 **10 References**

- 737 Alain, C., Arsenault, J. S., Garami, L., Bidelman, G. M., & Snyder, J. S. (2017). Neural  
738 Correlates of Speech Segregation Based on Formant Frequencies of Adjacent  
739 Vowels. *Scientific Reports*, 7(1), 40790. <https://doi.org/10.1038/srep40790>
- 740 Anderson, S., & Karawani, H. (2020). Objective evidence of temporal processing deficits in  
741 older adults. *Hearing Research*, 397, 108053.  
742 <https://doi.org/10.1016/j.heares.2020.108053>
- 743 Anderson, S., Parbery-Clark, A., White-Schwoch, T., Drehobl, S., & Kraus, N. (2013). Effects  
744 of hearing loss on the subcortical representation of speech cues. *The Journal of the*  
745 *Acoustical Society of America*, 133(5), 3030–3038. <https://doi.org/10.1121/1.4799804>
- 746 Badin, P., Perrier, P., Boë, L., & Abry, C. (1990). Vocalic nomograms: Acoustic and  
747 articulatory considerations upon formant convergences. *The Journal of the Acoustical*  
748 *Society of America*, 87(3), 1290–1300. <https://doi.org/10.1121/1.398804>
- 749 Belkhiria, C., Vergara, R. C., San Martín, S., Leiva, A., Marcenaro, B., Martinez, M.,  
750 Delgado, C., & Delano, P. H. (2019). Cingulate Cortex Atrophy Is Associated With  
751 Hearing Loss in Presbycusis With Cochlear Amplifier Dysfunction. *Frontiers in Aging*  
752 *Neuroscience*, 11. <https://doi.org/10.3389/fnagi.2019.00097>
- 753 Bernstein, L. E., & Liebenthal, E. (2014). Neural pathways for visual speech perception.  
754 *Frontiers in Neuroscience*, 8. <https://doi.org/10.3389/fnins.2014.00386>
- 755 Boersma, P., & Weenink, D. (2019). *Praat: Doing phonetics by computer [Computer*  
756 *program]* (6.0.48) [Computer software]. <http://www.praat.org/>
- 757 Boucher, V. J., Gilbert, A. C., & Jemel, B. (2019). The Role of Low-frequency Neural  
758 Oscillations in Speech Processing: Revisiting Delta Entrainment. *Journal of Cognitive*  
759 *Neuroscience*, 31(8), 1205–1215. [https://doi.org/10.1162/jocn\\_a\\_01410](https://doi.org/10.1162/jocn_a_01410)
- 760 Bourguignon, M., Baart, M., Kapnoula, E. C., & Molinaro, N. (2020). Lip-Reading Enables  
761 the Brain to Synthesize Auditory Features of Unknown Silent Speech. *Journal of*  
762 *Neuroscience*, 40(5), 1053–1065. <https://doi.org/10.1523/JNEUROSCI.1101-19.2019>
- 763 Brainard, D. H. (1997). The psychophysics toolbox. *Spatial Vision*, 10(4), 433–436.

- 764 <https://doi.org/10.1163/156856897X00357>
- 765 Bregman, A. S., Liao, C., & Levitan, R. (1990). Auditory grouping based on fundamental  
766 frequency and formant peak frequency. *Canadian Journal of Psychology*, *44*(3), 400–  
767 413. <https://doi.org/10.1037/h0084255>
- 768 Brown, V. A., Engen, K. V., & Peelle, J. E. (2021). *Face mask type affects audiovisual*  
769 *speech intelligibility and subjective listening effort in young and older adults*.  
770 PsyArXiv. <https://doi.org/10.31234/osf.io/7waj3>
- 771 Caniato, M., Marzi, A., & Gasparella, A. (2021). How much COVID-19 face protections  
772 influence speech intelligibility in classrooms? *Applied Acoustics*, *178*, 108051.  
773 <https://doi.org/10.1016/j.apacoust.2021.108051>
- 774 Chandrasekaran, C., Trubanova, A., Stillitano, S., Caplier, A., & Ghazanfar, A. A. (2009).  
775 The Natural Statistics of Audiovisual Speech. *PLoS Computational Biology*, *5*(7).  
776 <https://doi.org/10.1371/journal.pcbi.1000436>
- 777 Crosse, M. J., Liberto, G. M. D., & Lalor, E. C. (2016). Eye Can Hear Clearly Now: Inverse  
778 Effectiveness in Natural Audiovisual Speech Processing Relies on Long-Term  
779 Crossmodal Temporal Integration. *Journal of Neuroscience*, *36*(38), 9888–9895.  
780 <https://doi.org/10.1523/JNEUROSCI.1396-16.2016>
- 781 Erb, J., & Obleser, J. (2013). Upregulation of cognitive control networks in older adults’  
782 speech comprehension. *Frontiers in Systems Neuroscience*, *7*.  
783 <https://doi.org/10.3389/fnsys.2013.00116>
- 784 Erb, J., Schmitt, L.-M., & Obleser, J. (2020). Temporal selectivity declines in the aging  
785 human auditory cortex. *eLife*, *9*, e55300. <https://doi.org/10.7554/eLife.55300>
- 786 Escoffier, N., Herrmann, C. S., & Schirmer, A. (2015). Auditory rhythms entrain visual  
787 processes in the human brain: Evidence from evoked oscillations and event-related  
788 potentials. *NeuroImage*, *111*, 267–276.  
789 <https://doi.org/10.1016/j.neuroimage.2015.02.024>
- 790 Feld, J., & Sommers, M. (2009). Lipreading, Processing Speed, and Working Memory in  
791 Younger and Older Adults. *Journal of Speech, Language, and Hearing Research*,

- 792 52(6), 1555–1565. [https://doi.org/10.1044/1092-4388\(2009/08-0137\)](https://doi.org/10.1044/1092-4388(2009/08-0137))
- 793 Garg, S., Hamarneh, G., Jongman, A., Sereno, J. A., & Wang, Y. (2019). Computer-vision  
794 analysis reveals facial movements made during Mandarin tone production align with  
795 pitch trajectories. *Speech Communication*, 113, 47–62.  
796 <https://doi.org/10.1016/j.specom.2019.08.003>
- 797 Ghitza, O. (2017). Acoustic-driven delta rhythms as prosodic markers. *Language, Cognition*  
798 *and Neuroscience*, 32(5), 545–561. <https://doi.org/10.1080/23273798.2016.1232419>
- 799 Giovanelli, E., Valzolgher, C., Gessa, E., Todeschini, M., & Pavani, F. (2021). Unmasking  
800 the Difficulty of Listening to Talkers With Masks: Lessons from the COVID-19  
801 pandemic. *I-Perception*, 12(2), 2041669521998393.  
802 <https://doi.org/10.1177/2041669521998393>
- 803 Giraud, A.-L., & Poeppel, D. (2012). Cortical oscillations and speech processing: Emerging  
804 computational principles and operations. *Nature Neuroscience*, 15(4), 511–517.  
805 <https://doi.org/10.1038/nn.3063>
- 806 Giraud, A.-L., Price, C. J., Graham, J. M., Truy, E., & Frackowiak, R. S. J. (2001). Cross-  
807 Modal Plasticity Underpins Language Recovery after Cochlear Implantation. *Neuron*,  
808 30(3), 657–664. [https://doi.org/10.1016/S0896-6273\(01\)00318-X](https://doi.org/10.1016/S0896-6273(01)00318-X)
- 809 Goossens, T., Vercammen, C., Wouters, J., & Wieringen, A. van. (2016). Aging Affects  
810 Neural Synchronization to Speech-Related Acoustic Modulations. *Frontiers in Aging*  
811 *Neuroscience*, 8. <https://doi.org/10.3389/fnagi.2016.00133>
- 812 Gross, J., Hoogenboom, N., Thut, G., Schyns, P., Panzeri, S., Belin, P., & Garrod, S. (2013).  
813 Speech Rhythms and Multiplexed Oscillatory Sensory Coding in the Human Brain.  
814 *PLOS Biology*, 11(12), e1001752. <https://doi.org/10.1371/journal.pbio.1001752>
- 815 Hartmann, T., & Weisz, N. (2020). An Introduction to the Objective Psychophysics Toolbox.  
816 *Frontiers in Psychology*, 11. <https://doi.org/10.3389/fpsyg.2020.585437>
- 817 Hauswald, A., Lithari, C., Collignon, O., Leonardelli, E., & Weisz, N. (2018). A Visual Cortical  
818 Network for Deriving Phonological Information from Intelligible Lip Movements.  
819 *Current Biology*, 28(9), 1453-1459.e3. <https://doi.org/10.1016/j.cub.2018.03.044>

- 820 Henry, M. J., Herrmann, B., Kunke, D., & Obleser, J. (2017). Aging affects the balance of  
821 neural entrainment and top-down neural modulation in the listening brain. *Nature*  
822 *Communications*, 8, ncomms15801. <https://doi.org/10.1038/ncomms15801>
- 823 Hopkins, K., Moore, B. C. J., & Stone, M. A. (2008). Effects of moderate cochlear hearing  
824 loss on the ability to benefit from temporal fine structure information in speech. *The*  
825 *Journal of the Acoustical Society of America*, 123(2), 1140–1153.  
826 <https://doi.org/10.1121/1.2824018>
- 827 Keitel, A., Gross, J., & Kayser, C. (2018). Perceptually relevant speech tracking in auditory  
828 and motor cortex reflects distinct linguistic features. *PLOS Biology*, 16(3), e2004473.  
829 <https://doi.org/10.1371/journal.pbio.2004473>
- 830 Keitel, A., Gross, J., & Kayser, C. (2020). Shared and modality-specific brain regions that  
831 mediate auditory and visual word comprehension. *ELife*, 9, e56972.  
832 <https://doi.org/10.7554/eLife.56972>
- 833 Keitel, A., Ince, R. A. A., Gross, J., & Kayser, C. (2017). Auditory cortical delta-entrainment  
834 interacts with oscillatory power in multiple fronto-parietal networks. *NeuroImage*, 147,  
835 32–42. <https://doi.org/10.1016/j.neuroimage.2016.11.062>
- 836 Liberman, M. C. (2017). Noise-induced and age-related hearing loss: New perspectives and  
837 potential therapies. *F1000Research*, 6.  
838 <https://doi.org/10.12688/f1000research.11310.1>
- 839 Löhler, J., Akcicek, B., Kappe, T., Schlattmann, P., Wollenberg, B., & Schönweiler, R.  
840 (2014). Entwicklung und Anwendung einer APHAB-Datenbank. *HNO*, 62(10), 735–  
841 745. <https://doi.org/10.1007/s00106-014-2915-4>
- 842 Lorenzi, C., Debrulle, L., Garnier, S., Fleuriot, P., & Moore, B. C. J. (2009). Abnormal  
843 processing of temporal fine structure in speech for frequencies where absolute  
844 thresholds are normal. *The Journal of the Acoustical Society of America*, 125(1), 27–  
845 30. <https://doi.org/10.1121/1.2939125>
- 846 Lorenzi, C., Gilbert, G., Carn, H., Garnier, S., & Moore, B. C. J. (2006). Speech perception  
847 problems of the hearing impaired reflect inability to use temporal fine structure.

- 848 *Proceedings of the National Academy of Sciences*, 103(49), 18866–18869.  
849 <https://doi.org/10.1073/pnas.0607364103>
- 850 Maris, E., & Oostenveld, R. (2007). Nonparametric statistical testing of EEG- and MEG-data.  
851 *Journal of Neuroscience Methods*, 164(1), 177–190.  
852 <https://doi.org/10.1016/j.jneumeth.2007.03.024>
- 853 Mattout, J., Henson, R. N., & Friston, K. J. (2007, June 25). *Canonical Source*  
854 *Reconstruction for MEG* [Research Article]. Computational Intelligence and  
855 Neuroscience; Hindawi. <https://doi.org/10.1155/2007/67613>
- 856 Meyer, L. (2018). The neural oscillations of speech processing and language  
857 comprehension: State of the art and emerging mechanisms. *European Journal of*  
858 *Neuroscience*, 48(7), 2609–2621. <https://doi.org/10.1111/ejn.13748>
- 859 Moore, B. C. J. (2008). The Role of Temporal Fine Structure Processing in Pitch Perception,  
860 Masking, and Speech Perception for Normal-Hearing and Hearing-Impaired People.  
861 *Journal of the Association for Research in Otolaryngology*, 9(4), 399–406.  
862 <https://doi.org/10.1007/s10162-008-0143-x>
- 863 Moore, B. C. J., & Moore, G. A. (2003). Discrimination of the fundamental frequency of  
864 complex tones with fixed and shifting spectral envelopes by normally hearing and  
865 hearing-impaired subjects. *Hearing Research*, 182(1), 153–163.  
866 [https://doi.org/10.1016/S0378-5955\(03\)00191-6](https://doi.org/10.1016/S0378-5955(03)00191-6)
- 867 Nolte, G. (2003). The magnetic lead field theorem in the quasi-static approximation and its  
868 use for magnetoencephalography forward calculation in realistic volume conductors.  
869 *Physics in Medicine & Biology*, 48(22), 3637. [https://doi.org/10.1088/0031-](https://doi.org/10.1088/0031-9155/48/22/002)  
870 [9155/48/22/002](https://doi.org/10.1088/0031-9155/48/22/002)
- 871 O'Brien, F., & Cousineau, D. (2014). Representing Error bars in within-subject designs in  
872 typical software packages. *Tutorials in Quantitative Methods for Psychology*, 10(1),  
873 56–67.
- 874 Oostenveld, R., Fries, P., Maris, E., & Schoffelen, J.-M. (2011). FieldTrip: Open source  
875 software for advanced analysis of MEG, EEG, and invasive electrophysiological data.

- 876 *Intell. Neuroscience*, 2011, 1:1-1:9. <https://doi.org/10.1155/2011/156869>
- 877 O’Sullivan, A. E., Crosse, M. J., Di Liberto, G. M., & Lalor, E. C. (2017). Visual Cortical  
878 Entrainment to Motion and Categorical Speech Features during Silent Lipreading.  
879 *Frontiers in Human Neuroscience*, 10. <https://doi.org/10.3389/fnhum.2016.00679>
- 880 Park, H., Kayser, C., Thut, G., & Gross, J. (2016). Lip movements entrain the observers’ low-  
881 frequency brain oscillations to facilitate speech intelligibility. *ELife*, 5, e14521.  
882 <https://doi.org/10.7554/eLife.14521>
- 883 Peelle, J. E. (2018). Listening Effort: How the Cognitive Consequences of Acoustic  
884 Challenge Are Reflected in Brain and Behavior. *Ear and Hearing*, 39(2), 204–214.  
885 <https://doi.org/10.1097/AUD.0000000000000494>
- 886 Plass, J., Brang, D., Suzuki, S., & Grabowecy, M. (2020). Vision perceptually restores  
887 auditory spectral dynamics in speech. *Proceedings of the National Academy of*  
888 *Sciences*. <https://doi.org/10.1073/pnas.2002887117>
- 889 Poeppel, D., & Assaneo, M. F. (2020). Speech rhythms and their neural foundations. *Nature*  
890 *Reviews Neuroscience*, 1–13. <https://doi.org/10.1038/s41583-020-0304-4>
- 891 Presacco, A., Simon, J. Z., & Anderson, S. (2016a). Evidence of degraded representation of  
892 speech in noise, in the aging midbrain and cortex. *Journal of Neurophysiology*,  
893 116(5), 2346–2355. <https://doi.org/10.1152/jn.00372.2016>
- 894 Presacco, A., Simon, J. Z., & Anderson, S. (2016b). Effect of informational content of noise  
895 on speech representation in the aging midbrain and cortex. *Journal of*  
896 *Neurophysiology*, 116(5), 2356–2367. <https://doi.org/10.1152/jn.00373.2016>
- 897 Slade, K., Plack, C. J., & Nuttall, H. E. (2020). The Effects of Age-Related Hearing Loss on  
898 the Brain and Cognitive Function. *Trends in Neurosciences*, 43(10), 810–821.  
899 <https://doi.org/10.1016/j.tins.2020.07.005>
- 900 Smith, Z. M., Delgutte, B., & Oxenham, A. J. (2002). Chimaeric sounds reveal dichotomies in  
901 auditory perception. *Nature*, 416(6876), 87–90. <https://doi.org/10.1038/416087a>
- 902 Suess, N., Hauswald, A., Zehentner, V., Depireux, J., Herzog, G., Rösch, S., & Weisz, N.  
903 (2021). *Influence of linguistic properties and hearing impairment on lip reading skills*



- 904            *in the German language*. PsyArXiv. <https://doi.org/10.31234/osf.io/rcfxv>
- 905    Sumbly, W. H., & Pollack, I. (1954). Visual Contribution to Speech Intelligibility in Noise. *The*  
906            *Journal of the Acoustical Society of America*, 26(2), 212–215.  
907            <https://doi.org/10.1121/1.1907309>
- 908    Taulu, S., Simola, J., & Kajola, M. (2005). Applications of the signal space separation  
909            method. *IEEE Transactions on Signal Processing*, 53(9), 3359–3372.  
910            <https://doi.org/10.1109/TSP.2005.853302>
- 911    Tun, P. A., & Wingfield, A. (1999). One Voice Too Many: Adult Age Differences in Language  
912            Processing With Different Types of Distracting Sounds. *The Journals of Gerontology:*  
913            *Series B*, 54B(5), P317–P327. <https://doi.org/10.1093/geronb/54B.5.P317>
- 914    Tye-Murray, N., Sommers, M. S., & Spehar, B. (2007a). Audiovisual Integration and  
915            Lipreading Abilities of Older Adults with Normal and Impaired Hearing. *Ear and*  
916            *Hearing*, 28(5), 656–668. <https://doi.org/10.1097/AUD.0b013e31812f7185>
- 917    Tye-Murray, N., Sommers, M., & Spehar, B. (2007b). The Effects of Age and Gender on  
918            Lipreading Abilities. *Journal of the American Academy of Audiology*, 18(10), 883–  
919            892.
- 920    Tzourio-Mazoyer, N., Landeau, B., Papathanassiou, D., Crivello, F., Etard, O., Delcroix, N.,  
921            Mazoyer, B., & Joliot, M. (2002). Automated Anatomical Labeling of Activations in  
922            SPM Using a Macroscopic Anatomical Parcellation of the MNI MRI Single-Subject  
923            Brain. *NeuroImage*, 15(1), 273–289. <https://doi.org/10.1006/nimg.2001.0978>
- 924    Vaden, R. J., Hutcheson, N. L., McCollum, L. A., Kentros, J., & Visscher, K. M. (2012). Older  
925            adults, unlike younger adults, do not modulate alpha power to suppress irrelevant  
926            information. *NeuroImage*, 63(3), 1127–1133.  
927            <https://doi.org/10.1016/j.neuroimage.2012.07.050>
- 928    Veen, B. D. V., Drongelen, W. V., Yuchtman, M., & Suzuki, A. (1997). Localization of brain  
929            electrical activity via linearly constrained minimum variance spatial filtering. *IEEE*  
930            *Transactions on Biomedical Engineering*, 44(9), 867–880.  
931            <https://doi.org/10.1109/10.623056>

932 Wong, P. C. M., Jin, J. X., Gunasekera, G. M., Abel, R., Lee, E. R., & Dhar, S. (2009). Aging  
933 and cortical mechanisms of speech perception in noise. *Neuropsychologia*, *47*(3),  
934 693–703. <https://doi.org/10.1016/j.neuropsychologia.2008.11.032>
